# Supplementary material for: Re-assessment of monoclonal antibodies against diclofenac for their application in the analysis of environmental waters
Source: PubMed Central journal article supplement (PMC11138808; doi:10.1039/d3ay01333b), 2024-05-14
Supplement: AY-016-D3AY01333B-s001.pdf [file AY-016-D3AY01333B-s001.pdf]

## Supplementary Information

### Re-assessment of monoclonal antibodies against diclofenac for their application in the analysis of environmental waters

Stephan Schmidt,<sup>a,b</sup> Holger Hoffmann,<sup>a,c</sup> Leif-Alexander Garbe,<sup>d</sup> Andrea Harrer,<sup>e,f,g</sup> Markus Steiner,<sup>e,h</sup>  
Martin Himly<sup>e</sup> and Rudolf J. Schneider<sup>a,b</sup>

a) BAM Federal Institute for Materials Research and Testing, Department of Analytical Chemistry; Reference Materials, Richard-Willstätter-Str. 11, 12489 Berlin, Germany. E-mail: rudolf.schneider@bam.de; Tel: +49 3081041151

b) Technische Universität Berlin, Straße des 17. Juni 135, D-10623 Berlin

c) Humboldt-Universität zu Berlin, Department of Chemistry, Brook-Taylor-Str. 2, D-12489 Berlin, Germany

d) Hochschule Neubrandenburg, Fachbereich Agrarwirtschaft und Lebensmittelwissenschaften, D-17033 Neubrandenburg, Germany

e) Paris Lodron University of Salzburg, Department of Biosciences and Medical Biology, Division of Allergy and Immunology, A-5020 Salzburg, Austria

f) Current address: Paracelsus Medical University, Department of Neurology, A-5020 Salzburg, Austria

g) Current address: Paracelsus Medical University, Department of Dermatology and Allergology, A-5020 Salzburg, Austria

h) Current address: Salzburg Cancer Research Institute, Laboratory for Immunological and Molecular Cancer Research (SCRI-LIMCR), A-5020 Salzburg, Austria

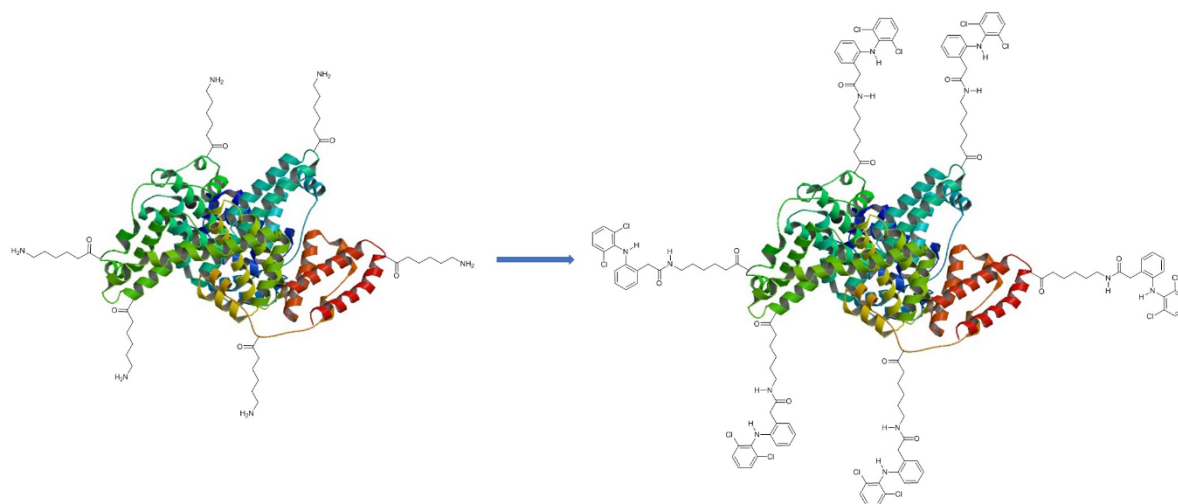

**Fig. S1** Direct coupling of DCF to 6-Ahx-BSA, avoiding the need for producing a spacer derivative of DCF beforehand

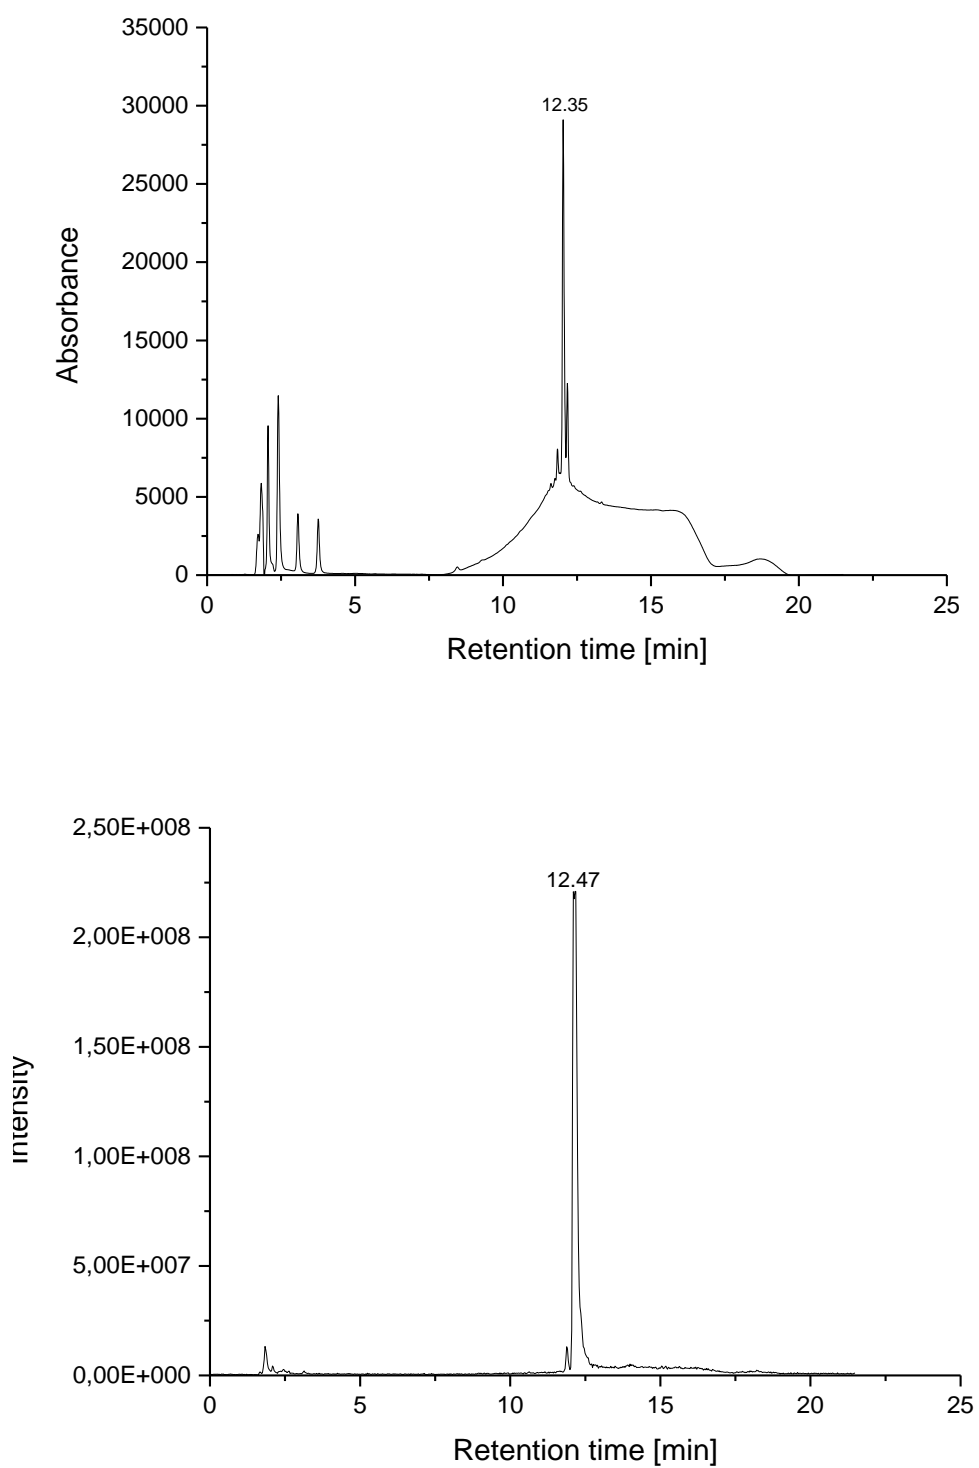

**Fig. S2** HPLC chromatograms of the enzymatic digest of DCF-6-Ahx-BSA (by protease from *Streptomyces griseus*), showing in the UV/Vis trace (upper panel), and  $m/z=537$  SIM trace (lower panel) the signals for DCF-6-Ahx-Lys at 12.35/12.47 min.

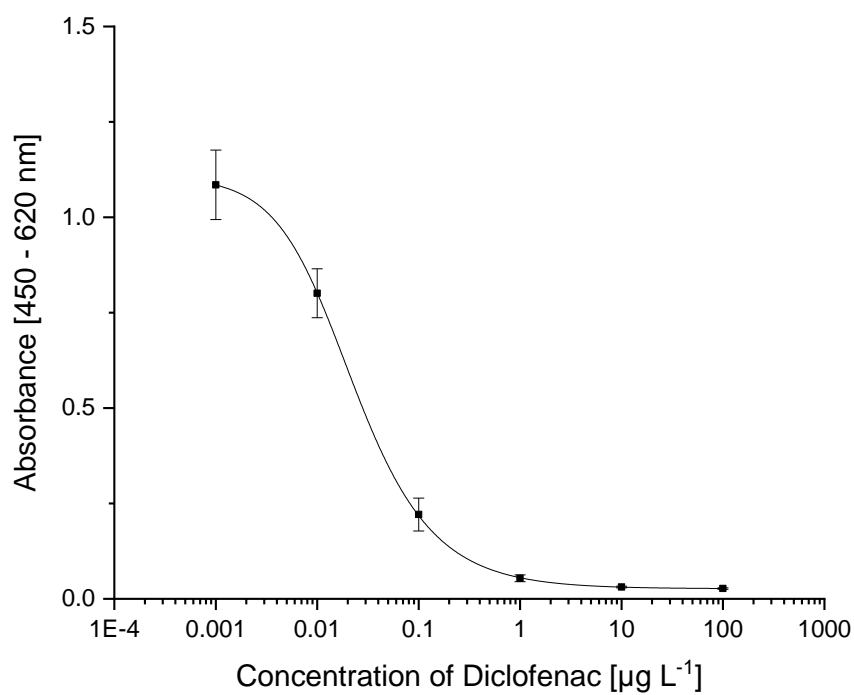

**Fig. S3** Calibration curve of an indirect ELISA for DCF after coating with the synthesized DCF-6-Ahx-BSA (1:40 000). Signal is created via a sandwich of anti-DCF mAb 12G5<sup>10</sup> (1:32 000) and an HRP-labelled anti-mouse secondary Ab (secAb1-HRP, 1:40 000)

**A**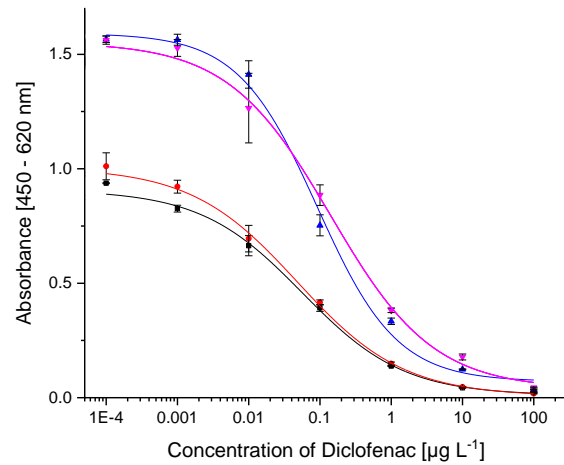**B**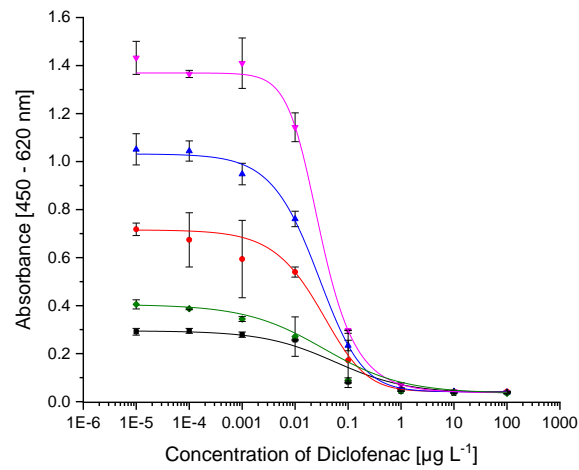**C**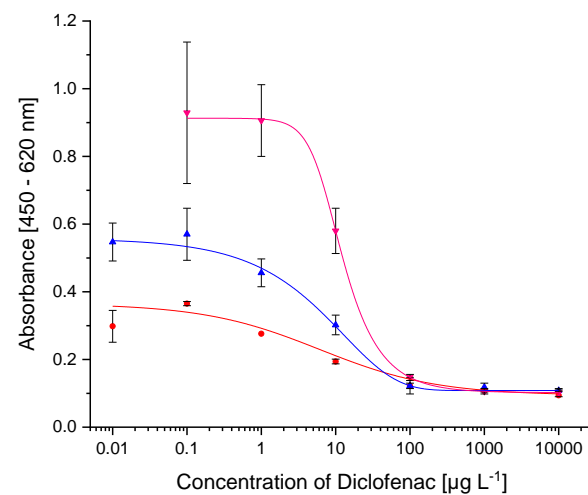

**Fig. S4** Calibration curves for DCF with different coating antigens (■DCF-OVA, ●DCF-6-Ahx-OVA, ▲DCF-6-Ahx-APO, ▼ACF-APO, ◆DCF-6-Ahx-BSA, diluted 1:40 000 (A and C) and 1:50 000 (B) in PBS), different primary antibodies (A: pAb1 1:32 000; B: mAb 12G5 1:10 000; C: mAb F01G21 1:10 000; all dilutions in TRIS) and different secondary antibodies (A: secAb2-HRP 1:40 000; B: secAb1-HRP 1:20 000; C: secAb1-HRP 1:40 000; all dilutions in PBS). All three primary antibodies were assessed with all five coating antigens. In cases, where no curve was obtained, it was omitted from the plots.

**Table S1**Elemental composition of the NOM (natural organic matter) employed <sup>53</sup>

| Element                  | Große Fuchskuhle | Schwarzer See |
|--------------------------|------------------|---------------|
| C [mg g <sup>-1</sup> ]  | 343.7            | 210.4         |
| H [mg g <sup>-1</sup> ]  | 38.5             | 25.7          |
| N [mg g <sup>-1</sup> ]  | 11.2             | 5.8           |
| S [mg g <sup>-1</sup> ]  | 27.9             | 45.8          |
| Fe [mg g <sup>-1</sup> ] | 2.53             | 0.12          |
| Mn [mg g <sup>-1</sup> ] | 0.15             | 0.09          |
| Zn [mg g <sup>-1</sup> ] | 0.06             | 0.02          |
| Cu [mg g <sup>-1</sup> ] | 0.06             | 0.04          |
| Al [mg g <sup>-1</sup> ] | 1.75             | 0.05          |
| K [mg g <sup>-1</sup> ]  | 7.8              | 8.8           |
| Na [mg g <sup>-1</sup> ] | 93               | 175           |
| Ca [mg g <sup>-1</sup> ] | 6.4              | 24.9          |
| Ash content [%]          | 43.3             | 74.4          |
| Water content [%]        | 7.3              | 6.0           |

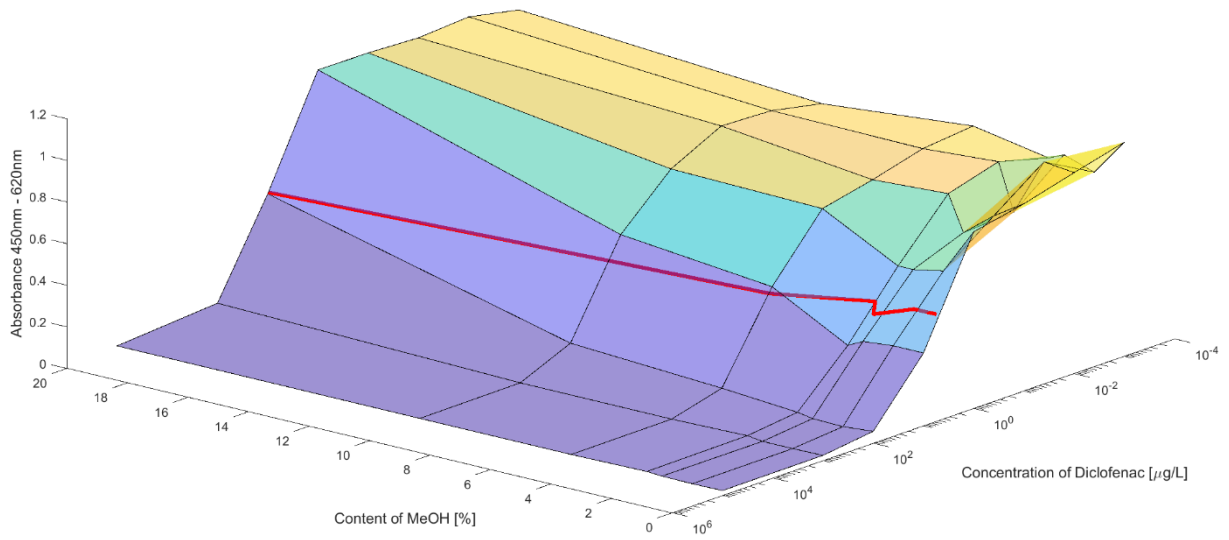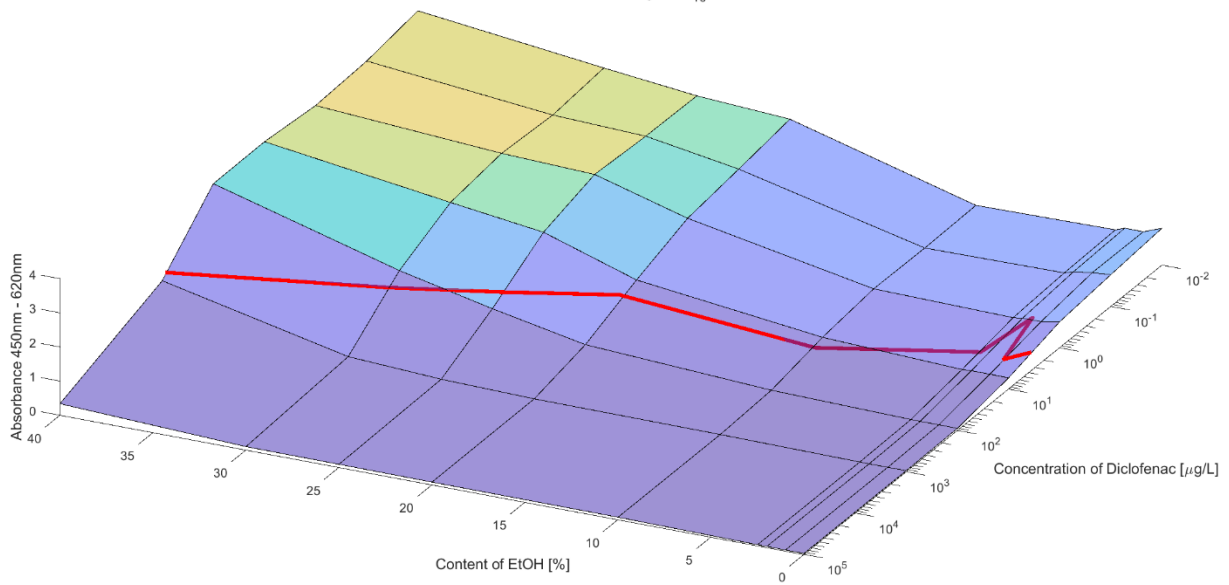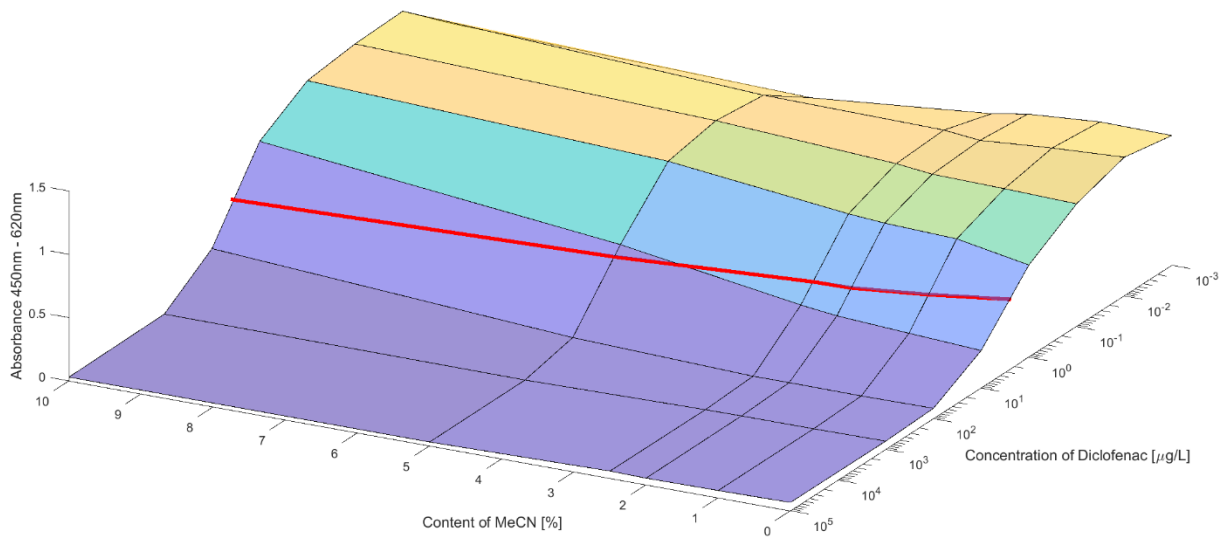

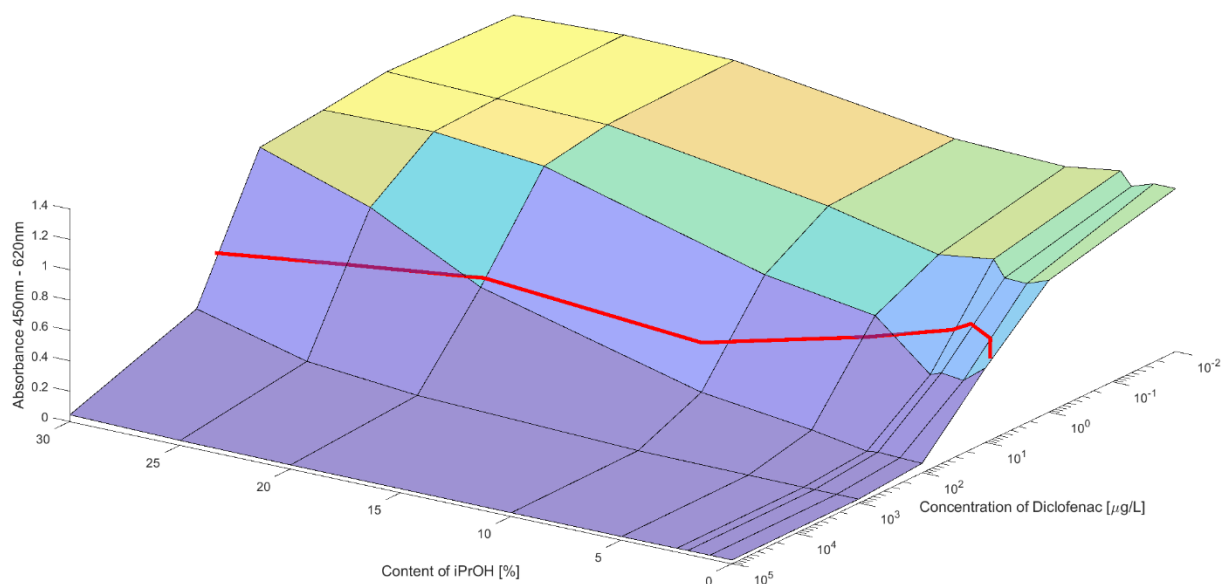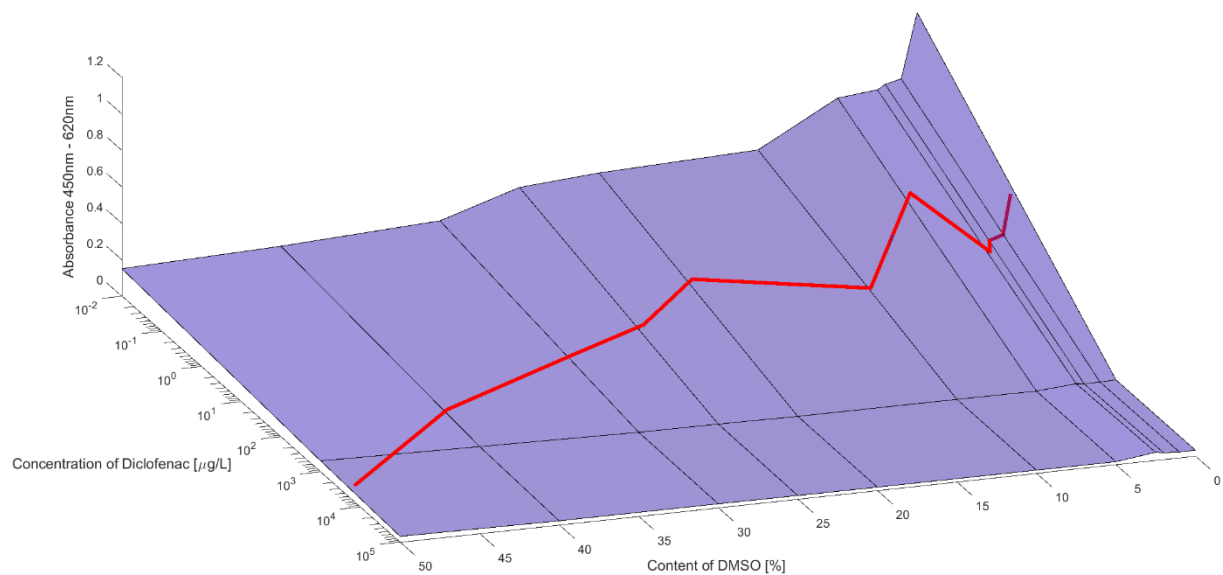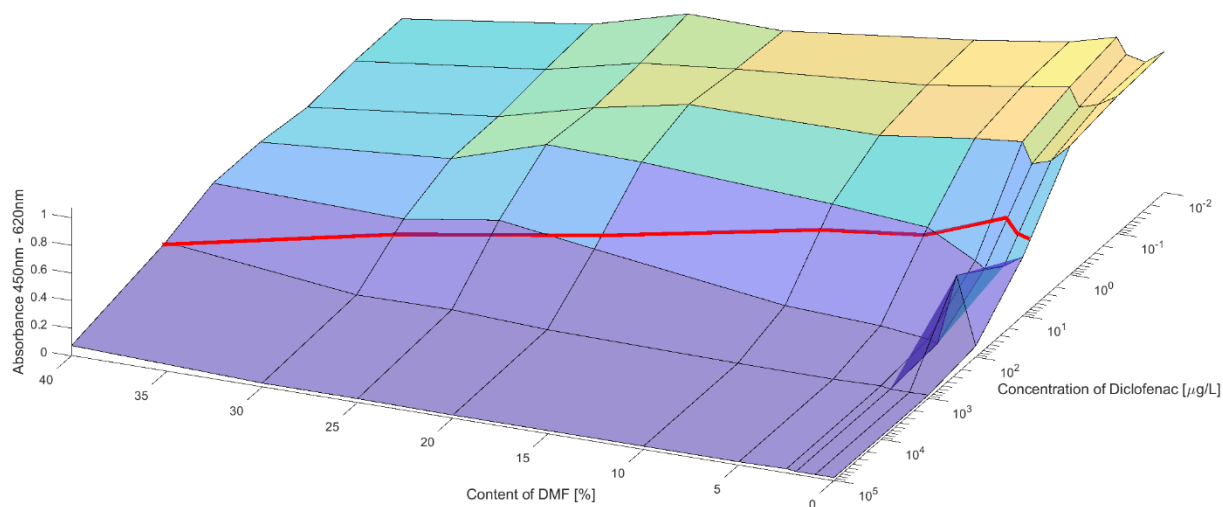

**Fig. S5** ELISA calibration functions for DCF with increasing solvent share in the calibrators in a 3D plot (from top to bottom: methanol, ethanol, acetonitrile, isopropanol, DMSO, DMF). The red line connects test midpoints (IC<sub>50</sub> values) and helps to illustrate trends in the sensitivity of the assays.



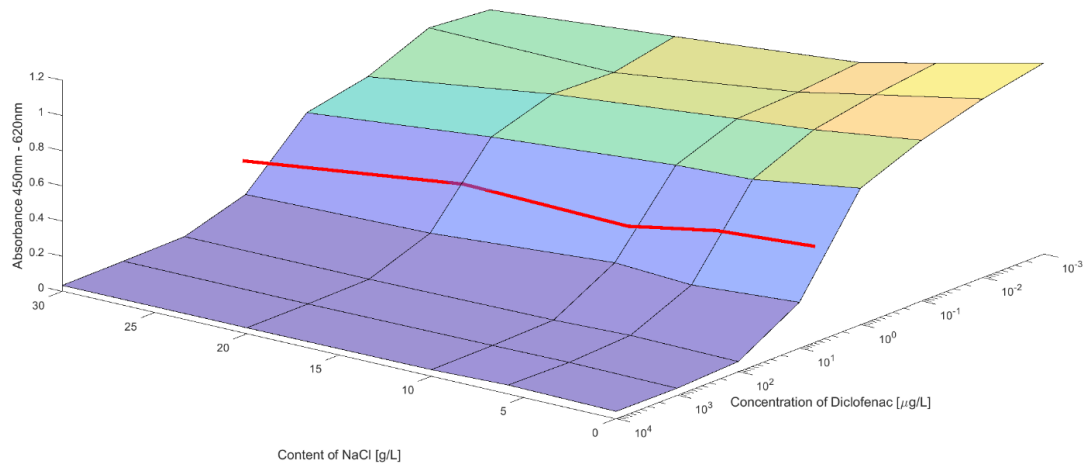

**Fig. S6** ELISA calibration function for DCF with increasing concentration of sodium chloride in the calibrators in a 3D plot. The red line connects test midpoints, indicating little influence of salt concentration on this parameter, i.e., on assay sensitivity.

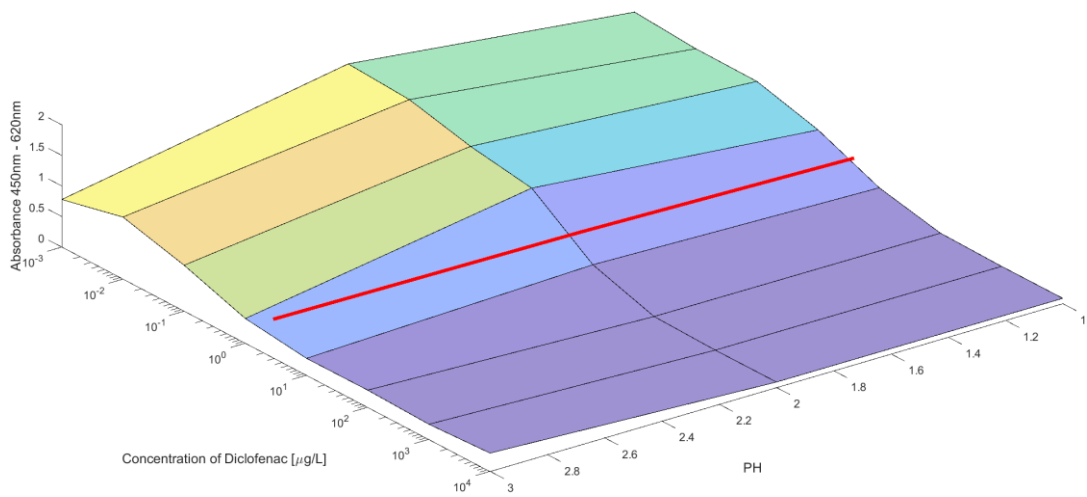

**Fig. S7** pH dependency of the DCF calibration function in the acidic range in a 3D plot. The red line connects test midpoints, indicating little dependence on sample pH.

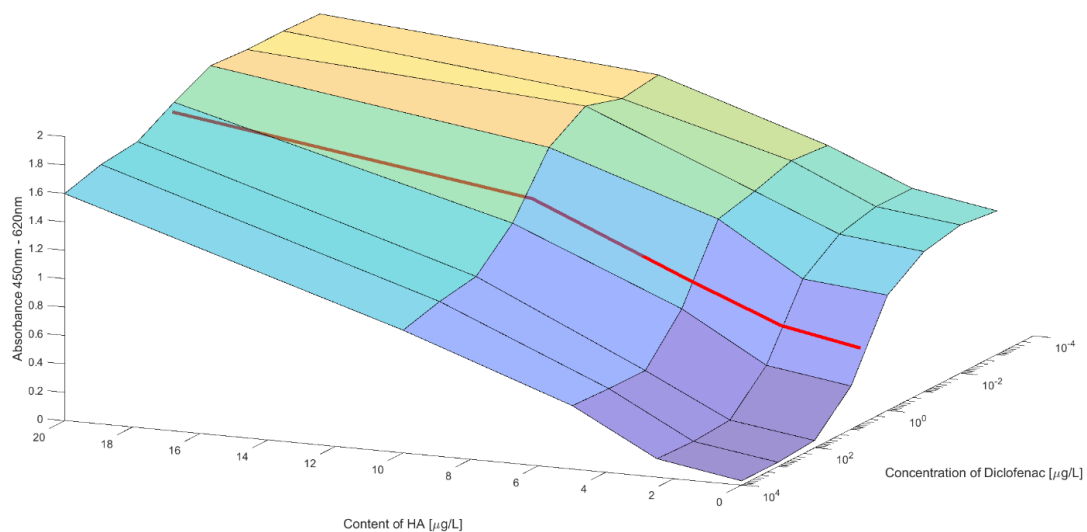

**Fig. S8** ELISA calibration function for DCF with increasing humic acid (HA) content in a 3D plot. The red line connects test midpoints and illustrates the severe changes starting right above 2.5 mg/L humic acid, meaning a strong influence of humic acid content in samples.

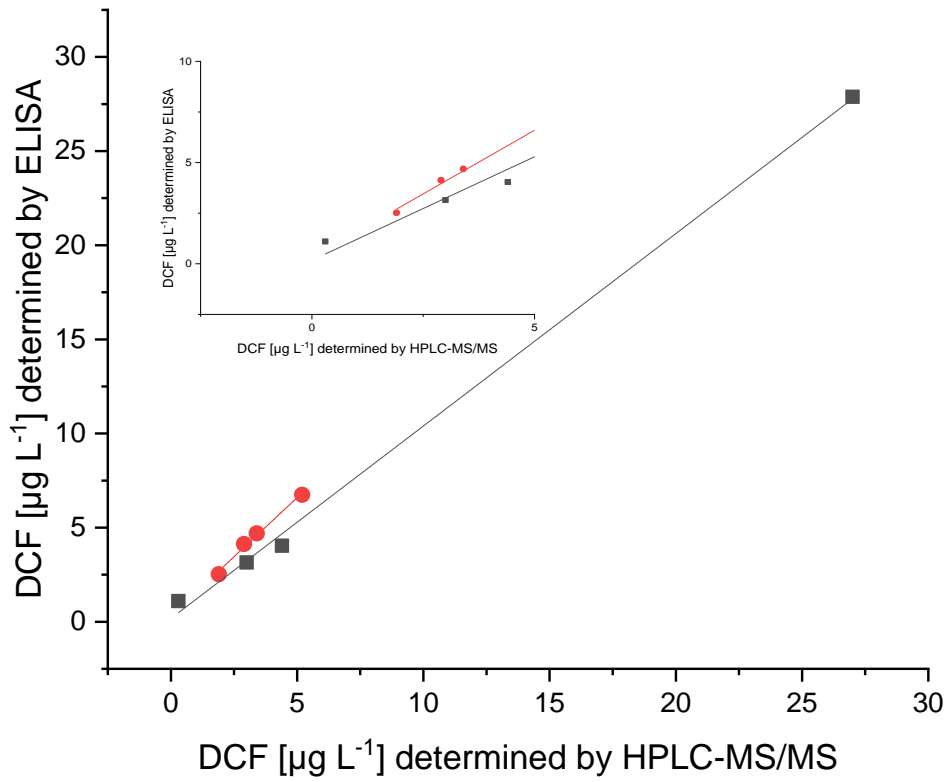

**Fig S9** Correlation between ELISA and HPLC-MS/MS results (■ Surface water, ● Wastewater)

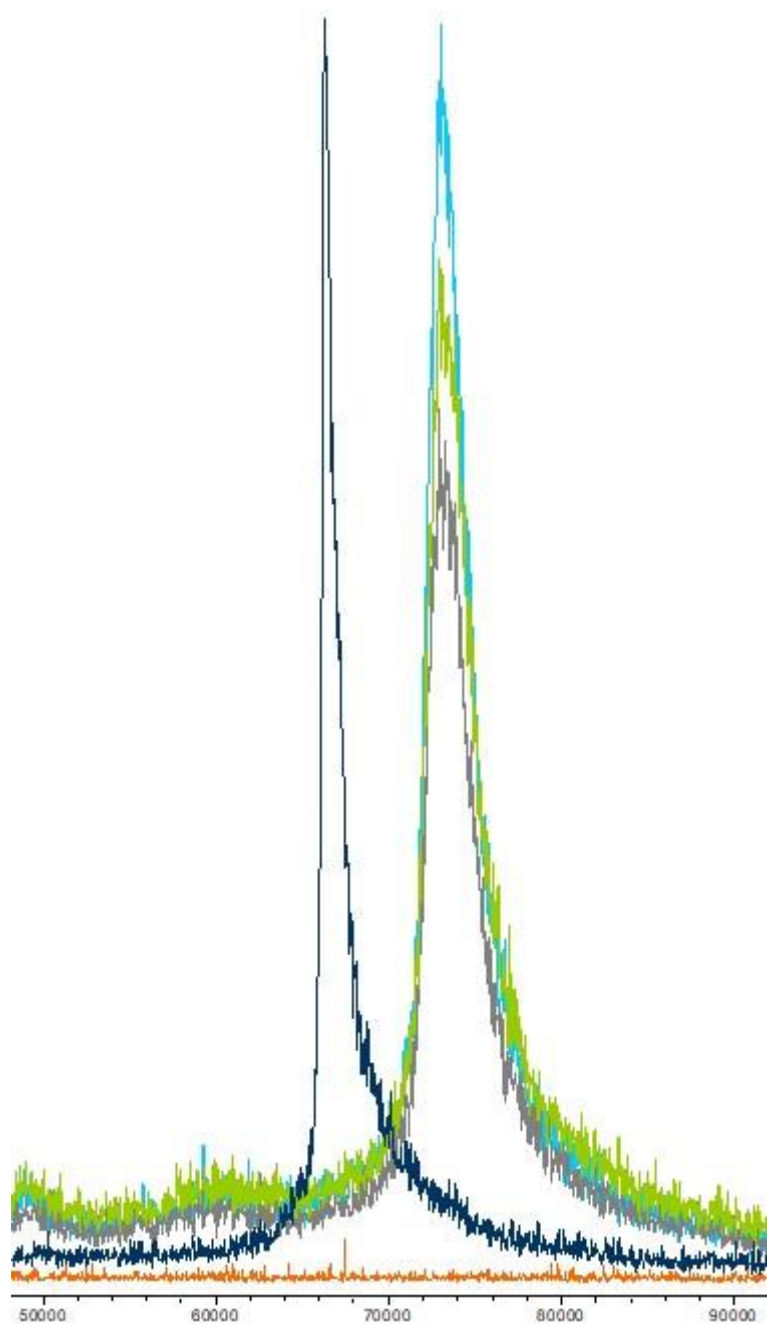

**Fig S10** MALDI-ToF-MS spectra (detail) of Boc-6-Ahx-BSA (average mass peak at  $m/z$  76,668 Da, green), deprotected Boc-6-Ahx-BSA (= 6-Ahx-BSA, 71,280 Da, grey), and DCF-6-Ahx-BSA (75,254 Da, light blue). Average mass peak of BSA at  $m/z$  66,411 Da (dark blue).

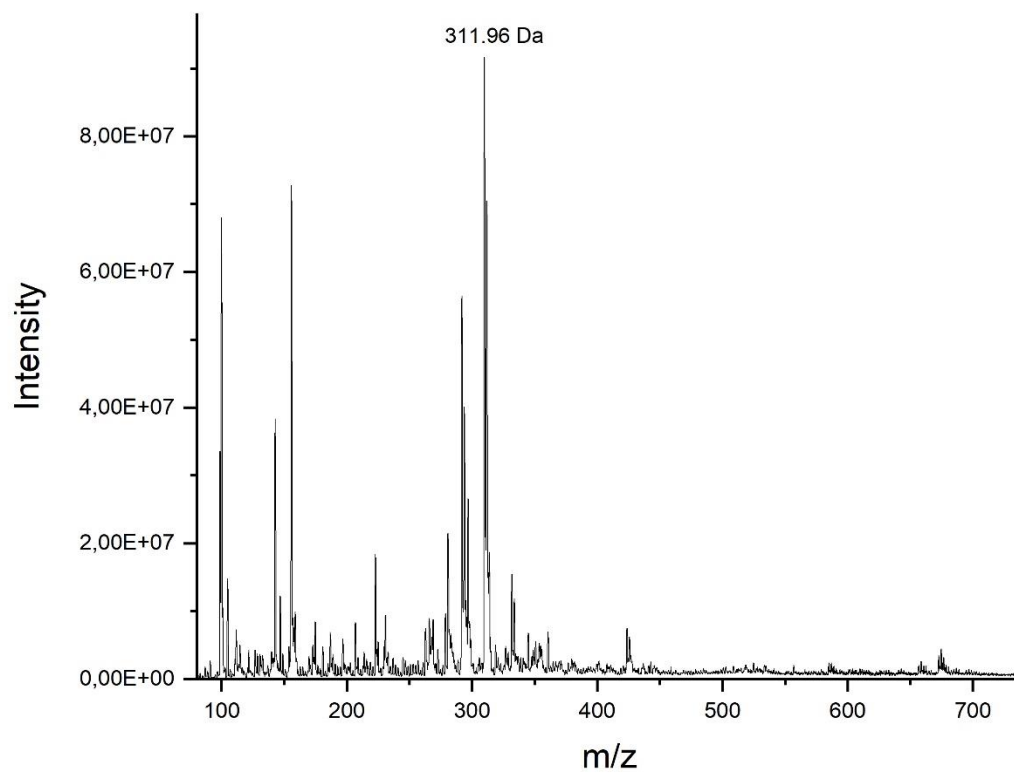

**Fig. S11** MS spectrum of DCF-Me (base peak at  $m/z = 311.96$  Da confirming the identity of the compound).

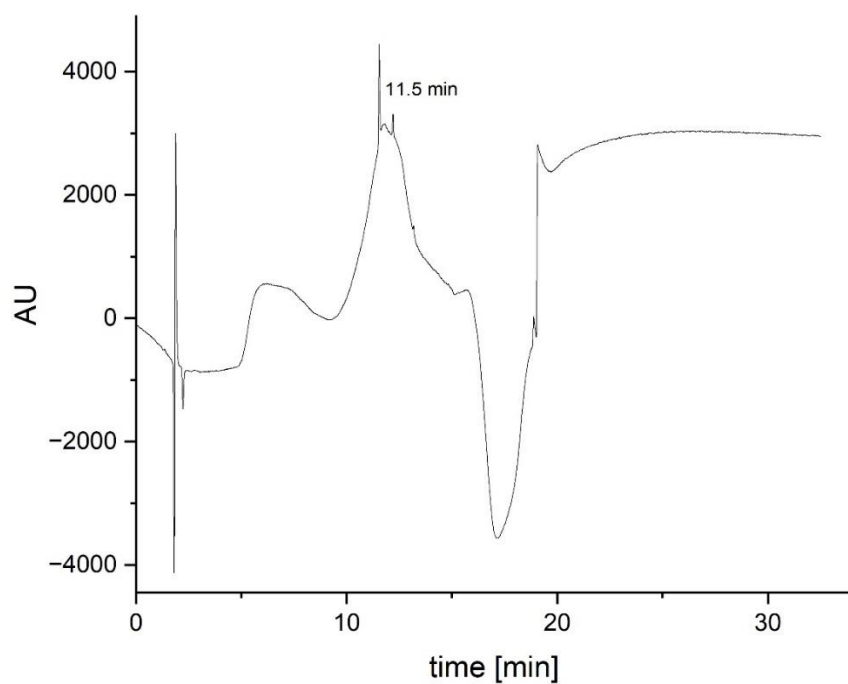

**Fig. S12** UV trace of the LC separation of the photodegradation product. The product elutes around 11.5 min.

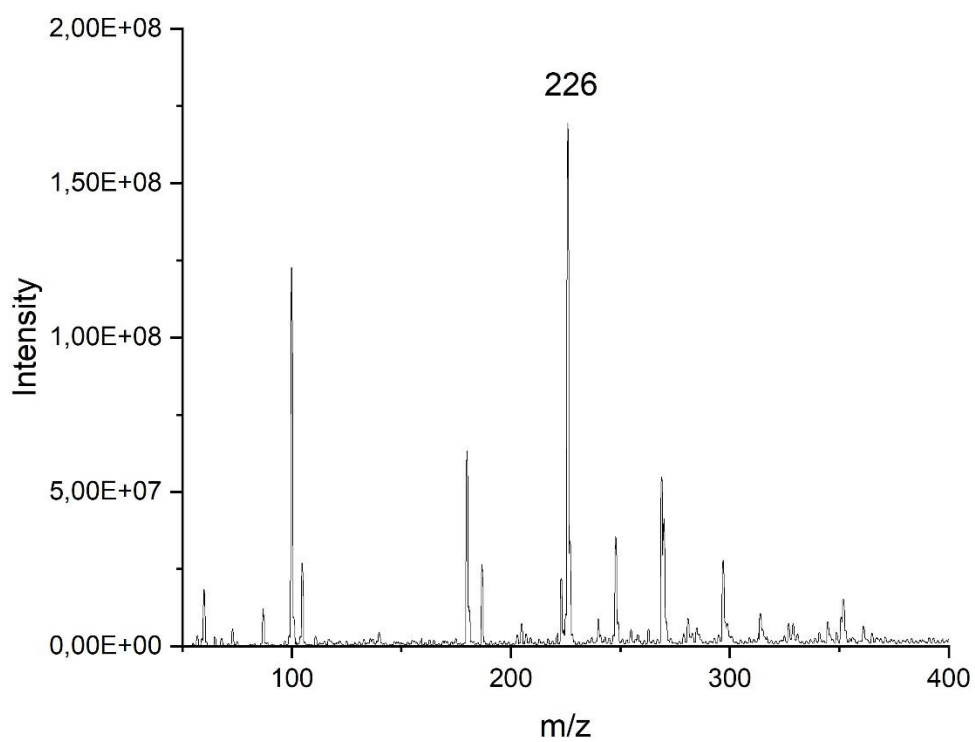

**Fig. S13** Mass spectrum of isolated photodegradation product ( $C_{14}O_2NH_{11}$ ). Identity is confirmed by its base peak at  $m/z = 226$  (M+H).
